# Supplementary material for: Heterostructure seed-mediated synthesis of zinc phosphide quantum dots for bright band-edge emission
Source: Royal Society of Chemistry journal article supplement (doi:10.1039/d4nr02524e), 2024-01-01
Supplement: d4nr02524e1.pdf [file d4nr02524e1.pdf]

## Supplementary Information

# Heterostructure Seed-Mediated Synthesis of $\text{Zn}_3\text{P}_2$ Quantum Dots for Bright Band-Edge Emission

*Ju ho Kim<sup>†</sup>, Hyekyeong Kwon<sup>†</sup>, Myoungho Jeong<sup>‡</sup>, and Jiwon Bang<sup>†\*</sup>*

<sup>†</sup> Department of chemistry, Incheon National University Yeonsu-gu, Incheon 22012, Republic of Korea

<sup>‡</sup> Samsung Future Technology Campus, 130 Samsung-ro, Yeongtong-gu, Suwon, Korea

Republic

Corresponding Author

\* E-mail: jwbang@inu.ac.kr

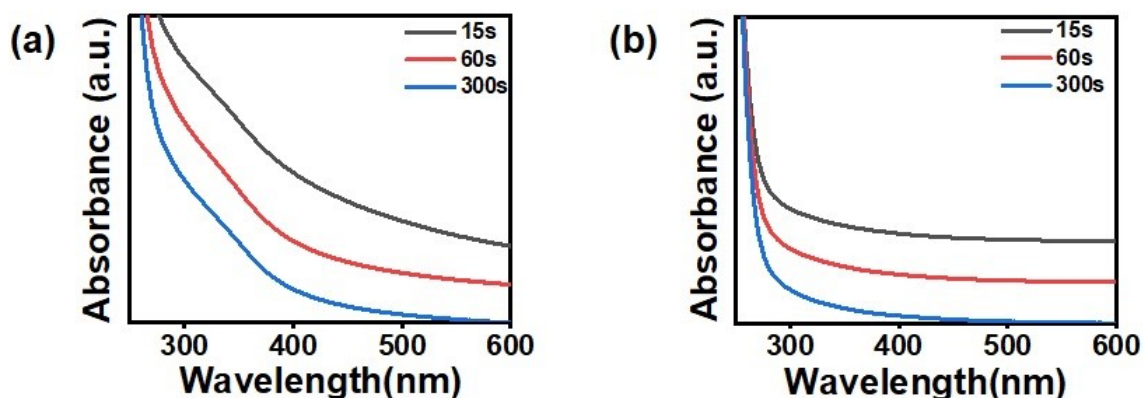

**Figure S1.** UV-vis absorption spectra of the reaction solution over time at 270 °C, showing the spectral evolution for (a) solution containing In and P precursors and (b) solution containing Zn and P precursors. The precursor concentrations of the reaction vessels are identical to those used for the synthesis of In(Zn)P- $\text{Zn}_3\text{P}_2$  QDs, as described in the experimental section of the main text.

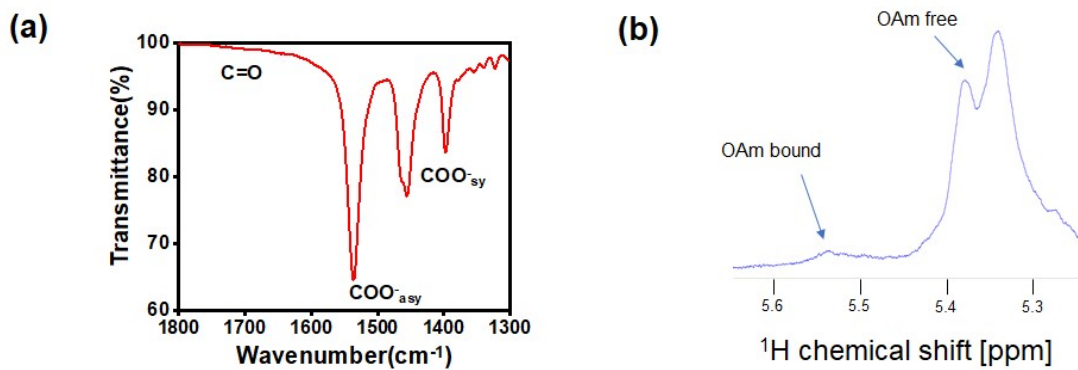

**Figure S2.** (a) FTIR spectra and (b) vinyl region of the <sup>1</sup>H NMR spectra of the 18-month-aged In(Zn)P-Zn<sub>3</sub>P<sub>2</sub> QDs.

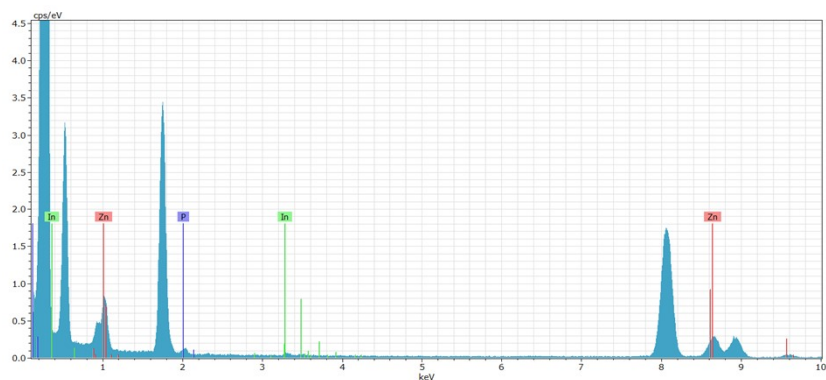

**Figure S3.** EDS profile of the In(Zn)P-Zn<sub>3</sub>P<sub>2</sub> QDs.

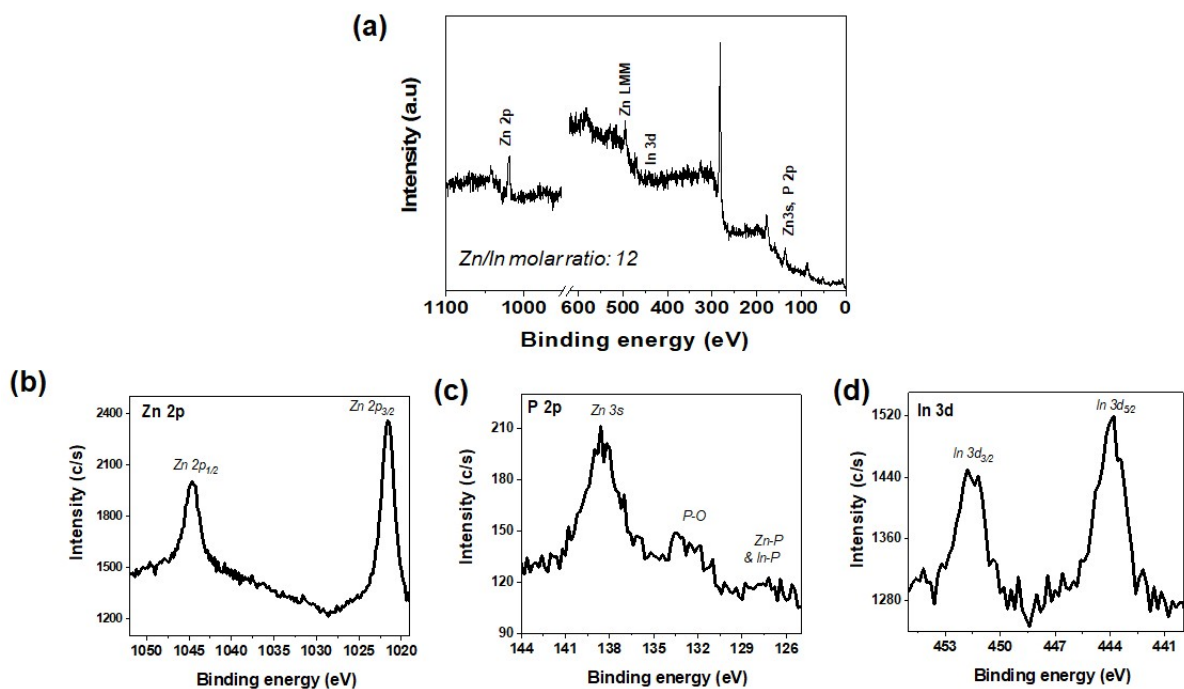

**Figure S4.** (a) XPS survey spectrum and (b–d) high-resolution XPS spectra of the In(Zn)P-Zn<sub>3</sub>P<sub>2</sub> QDs.

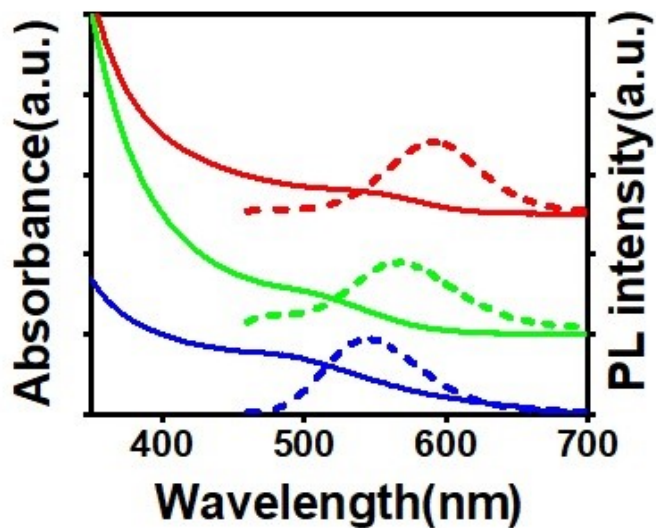

**Figure S5.** Absorption (solid lines) and corresponding PL emission spectra (dashed lines) for a series of In(Zn)P-Zn<sub>3</sub>P<sub>2</sub> QDs with ZnS shell coatings derived from different batches of In(Zn)P-Zn<sub>3</sub>P<sub>2</sub> core QD samples.

**Table S1.** Room-temperature bi-exponential PL decay fitting parameters of the PL decay spectra for the In(Zn)P-Zn<sub>3</sub>P<sub>2</sub> and In(Zn)P-Zn<sub>3</sub>P<sub>2</sub>/ZnS core/shell QD samples, as presented in Figure 5c.

| <b>Sample</b>                               | <b>A<sub>1</sub> (%)</b> | <b>τ<sub>1</sub> (ns)</b> | <b>A<sub>2</sub>(%)</b> | <b>τ<sub>2</sub> (ns)</b> | <b>τ<sub>ave</sub> (ns)</b> |
|---------------------------------------------|--------------------------|---------------------------|-------------------------|---------------------------|-----------------------------|
| In(Zn)P-Zn <sub>3</sub> P <sub>2</sub>      | <b>56.5</b>              | <b>11.1</b>               | <b>43.4</b>             | <b>72.1</b>               | <b>61.9</b>                 |
| In(Zn)P-Zn <sub>3</sub> P <sub>2</sub> /ZnS | <b>48.1</b>              | <b>12.5</b>               | <b>51.9</b>             | <b>82.9</b>               | <b>74.3</b>                 |

$$I_t = A_1 e^{-t/\tau_1} + A_2 e^{-t/\tau_2}$$

$$\tau_{ave} = \frac{(A_1 \tau_1^2 + A_2 \tau_2^2)}{(A_1 \tau_1 + A_2 \tau_2)}$$
